# Supplementary material for: Lichenysin-like Polypeptide Production by Bacillus licheniformis B3-15 and Its Antiadhesive and Antibiofilm Properties
Source: MDPI journal article supplement (doi:10.3390/microorganisms11071842), 2023-07-20
Supplement: s1 [file s1]

## Supplementary materials

### Lichenysin-like Polypeptide Production by *Bacillus licheniformis* B3-15 and Its Antiadhesive and Antibiofilm Properties

Vincenzo Zammuto <sup>1,2,3</sup>, Maria Giovanna Rizzo <sup>1,\*</sup>, Claudia De Pasquale <sup>4</sup>, Guido Ferlazzo <sup>5,6</sup>, Maria Teresa Caccamo <sup>2,7</sup>, Salvatore Magazù <sup>2,3,7</sup>, Salvatore Pietro Paolo Guglielmino <sup>1</sup> and Concetta Gugliandolo <sup>1,2,\*</sup>

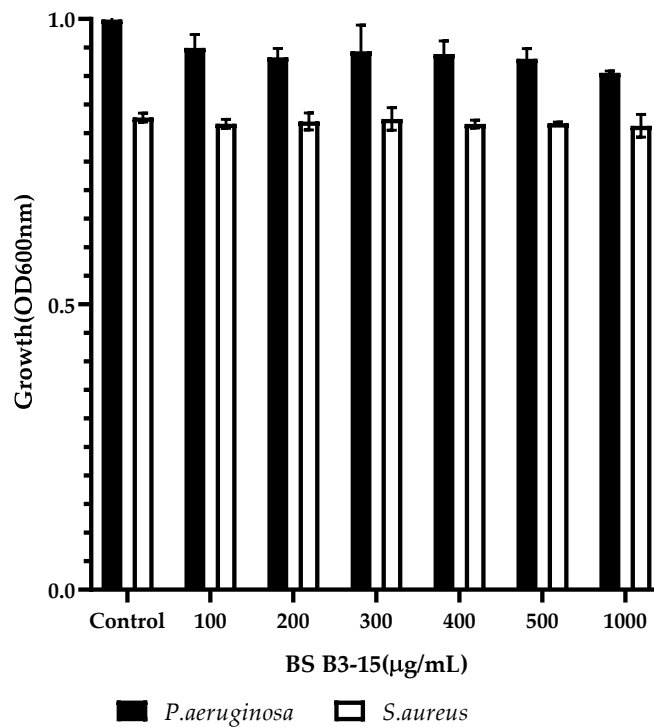

**Figure S1.** Effects of EPS B3-15 addition at different concentrations (from 100 to 1000  $\mu\text{g/mL}$ ) on the growth (OD600nm) of *P. aeruginosa* (a) and *S. aureus* (b). Data represent mean  $\pm$  SD for six replicates ( $n = 6$ ).

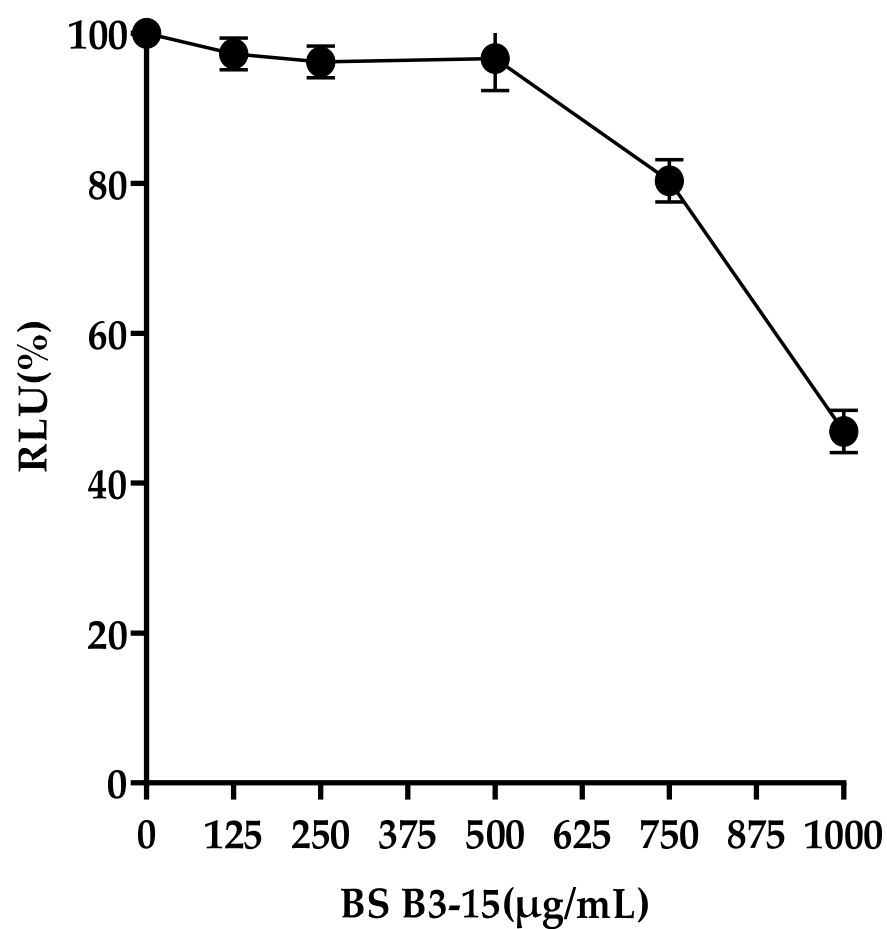

**Figure S2.** Effects of the BS B3-15 presence at different concentrations on the luminescence of *V. harveyi* G5 after 15 min, as percentage of relative luminescence unit (RLU). Data represent mean  $\pm$  SD for six replicates ( $n = 6$ ).
